1 **Human influenza A virus H1N1 in marine mammals in California, 2019**

2

3 Magdalena Plancarte<sup>1#</sup>, Ganna Kovalenko<sup>2,3#</sup>, Julie Baldassano<sup>1</sup>, Ana L. Ramírez<sup>1</sup>,  
4 Selina Carrillo<sup>1</sup>, Pádraig J. Duignan<sup>4</sup>, Ian Goodfellow<sup>2</sup>, Eric Bortz<sup>3</sup>, Jayeeta Dutta<sup>5</sup>, Harm  
5 van Bakel<sup>5,6</sup>, Lark L. Coffey<sup>1,\*</sup>

6

7 <sup>1</sup>Department of Pathology, Microbiology, and Immunology, School of Veterinary  
8 Medicine, University of California Davis, Davis, California, United States

9 <sup>2</sup>Division of Virology, Department of Pathology, University of Cambridge, Cambridge,  
10 United Kingdom

11 <sup>3</sup>Department of Biological Sciences, University of Alaska, Anchorage, Alaska, United  
12 States

13 <sup>4</sup>The Marine Mammal Center, Sausalito, California, United States

14 <sup>5</sup>Department of Genetics and Genomic Sciences, Icahn School of Medicine at Mount  
15 Sinai, New York, New York, United States

16 <sup>6</sup>Icahn Genomics Institute, Icahn School of Medicine at Mount Sinai, New York, New  
17 York, United States

18

19 #Co-first author

20 \*Corresponding Author, [lcoffey@ucdavis.edu](mailto:lcoffey@ucdavis.edu)

21

22

23 **Short Title:** Influenza A virus in marine mammals, 2019

24

25

## 26 **Abstract**

27

28 From 2011-2018, we conducted surveillance in marine mammals along the California  
29 coast for influenza A virus (IAV), frequently detecting anti-influenza antibodies and  
30 intermittently detecting IAV. In spring 2019, this pattern changed. Despite no change in  
31 surveillance intensity, we detected IAV RNA in 10 samples in March and April, mostly in  
32 nasal and rectal swabs from northern elephant seals (*Mirounga angustirostris*).

33 Although virus isolation was unsuccessful, IAV sequenced from one northern elephant  
34 seal nasal swab showed close genetic identity with pandemic H1N1 IAV subclade  
35 6B.1A.1 that was concurrently circulating in humans in the 2018/19 influenza season.  
36 This represents the first report of human A(H1N1)pdm09 IAV in northern elephant seals  
37 since 2010, suggesting IAV continues to spill over from humans to pinnipeds.

38

## 39 **Introduction**

40

41 Influenza A virus (IAV) infection has been reported in North American marine mammals  
42 since 1979 [1–4]. More than 300,000 marine mammals, including California sea lions  
43 (CSL), Steller sea lions, Northern and Guadalupe fur seals, Pacific harbor seals (PHS),  
44 and northern elephant seals (NES), live in the eastern North Pacific Ocean and molt  
45 and birth along mainland and island coastlines of California [5]. Pinnipeds in California  
46 are in contact with influenza virus reservoirs, including avian and mammalian hosts [6].

47 In 2009, pandemic H1N1 IAV emerged in the United States, spread worldwide, and was  
48 detected in NES in California in 2010 [6] and in northern sea otters in Washington state  
49 in 2011 [7]. Through our IAV surveillance in marine mammals on the California coast  
50 from 2011-2018, we rarely detected IAV RNA that indicates current or recent infection.

51 IAV antibody detection, which reveals previous IAV infection, is more common. This  
52 study focuses on a cluster of IAV RNA positive detections in two species of marine  
53 mammals stranded on California coasts in spring 2019. Sequence analyses of IAV from  
54 one NES show close identity with 2018 and 2019 human H1N1 IAV.

55

## 56 **Materials and Methods**

57

58 *Sample collections.* Marine mammals were sampled as part of ongoing IAV surveillance  
59 from 2011-2019. Nasal and rectal swabs and blood, were collected at intake from  
60 pinnipeds who became stranded along the California coast and were admitted for  
61 rehabilitation to The Marine Mammal Center (TMMC) in Sausalito, CA. Marine mammal  
62 sampling was performed by TMMC staff with prior authorization from the National  
63 Oceanic and Atmospheric Administration National Marine Fisheries Service Marine  
64 Mammal Protection Act. In spring 2019, after detecting IAV RNA in several samples, we  
65 modified sampling to add a second blood sample collection from some animals 2 to 3  
66 weeks after collecting the first sample. Nasal and rectal swabs were placed individually  
67 or combined in vials containing 1.5 mL of viral transport media (VTM). Blood was  
68 collected in serum separator tubes which were centrifuged at 4000 revolutions per  
69 minute (rpm) for 10 minutes (min), after which serum was transferred to a cryovial.  
70 Samples were refrigerated for up to 1 week before being transferred to a laboratory,  
71 where they were immediately processed or stored at  $-80^{\circ}\text{C}$ .

72

73 *Serology assays.* Sera diluted 1:10 were screened in a single replicate for IAV antibody  
74 directed against a conserved epitope of the IAV nucleoprotein (NP) using an enzyme-  
75 linked immunosorbent assay (ELISA) kit ID-Screen® Influenza A Antibody Competition

76 Multi-species kit, (IDvet, Grabels, France) following the manufacturer's instructions.  
77 Positive and negative controls provided with the kit were included on each plate. An  
78 ELX808 BioTek Spectrophotometer (BioTek Instruments, Winooski, VT) was used to  
79 measure absorbance. A sample was reported to contain IAV NP antibody when the  
80 absorbance ratio of the test sample to the negative control (**S/N** ratio) was less than  
81 0.45, as previously established [8]. For a subset of animals in 2019 with detectable  
82 ELISA IAV NP in serum at intake or in the second sample, hemagglutination inhibition  
83 (HI) assays were also performed to identify the IAV subtype per established criteria [9].  
84 Each sample was tested in triplicate by HI with each of 3 IAV strains: an H1N1 Northern  
85 elephant seal isolate from 2010 (A/Elephant seal/California/1/2010(H1N1)), an H3N8  
86 harbor seal isolate from 2011 (A/harbor seal/New Hampshire/179629/2011(H3N8)), and  
87 an H5N2 mallard duck isolate from 2010 (A/mallard/California/2396/2010(H5N2))  
88 following an established protocol [10]. The H1N1 and H3N8 subtypes were selected  
89 since they were previously reported in marine mammals, and the H5N2 subtype was  
90 used as it is common in water birds that share shoreline environments with pinnipeds.  
91 Positive control sera from a ferret that had been experimentally inoculated with an H1N1  
92 strain was provided by Dr. Randy Albrecht, Icahn School of Medicine at Mount Sinai,  
93 New York. For HI assays serum was diluted 1:4 with receptor destroying enzyme (RDE,  
94 Denka Seiken, Tokyo) and incubated for 18 hours at 37°C, followed by 30 min at 56°C.  
95 Sera were then serially diluted 2-fold in phosphate-buffered saline (PBS) and incubated  
96 with 4 hemagglutination units of virus for 60 min at room temperature. Chicken  
97 erythrocytes (Lampire, Pipersville) at a final concentration of 0.25% in PBS were added  
98 to sera and virus, and the mixture was incubated for 60 minutes at 27°C. Treated sera  
99 were also tested for hemagglutination in the absence of virus to verify effective RDE  
100 treatment and to ensure the absence of nonspecific hemagglutination. Serum was

101 defined as negative for HI when a titer below 1:8 was detected. Non-reactive samples  
102 are reported as <8.

103

104 *IAV RNA detection.* RNA was extracted using a MagMAX-96 AI/ND Viral RNA Isolation  
105 Kit (Applied Biosystems, Foster City, CA) using a KingFisher Magnetic Particle  
106 Processor (Thermo Scientific, Waltham, MA). RNA extracts were screened for IAV  
107 using the AgPath-ID™ One Step RT-PCR mix (Applied Biosystems, Foster City, CA)  
108 and an ABI 7500 real-time PCR System (Applied Biosystems, Foster City, CA). The  
109 real-time reverse transcription polymerase chain reaction (RRT-PCR) targets a  
110 conserved region of the IAV matrix gene [11]. Each RNA extract was tested in one  
111 replicate. Each RRT-PCR plate included an IAV isolate from cell culture as a positive  
112 control and VTM diluent as a negative control. Samples with a cycle threshold (Ct) value  
113 <45 were considered positive.

114

115 *Virus isolation.* Virus isolation was attempted for all RRT-PCR positive samples by  
116 inoculation into embryonated chicken eggs (Charles River, CT, USA) and Madin-Darby  
117 canine kidney cells (MDCK, ATCC, Manassas, Virginia). Each sample was inoculated  
118 into eggs and cells twice using a described protocol [6]. After each isolation attempt,  
119 egg samples were screened by RRT-PCR for IAV RNA, and cells were observed for  
120 cytopathic effects characteristic of IAV infection.

121

122 *Hemagglutinin (HA) subtyping and genome sequencing.* We amplified and sequenced a  
123 portion of the IAV HA gene from RRT-PCR positive samples before conducting whole-  
124 genome sequencing. HA subtyping was performed using a protocol modified from [12]  
125 that generates a 640 base pair (bp) PCR product. The forward primer 5'

126 GGRATGRTHGAYGGNTGGTAYGG 3' was modified from a validated primer [12] to  
127 include HA sequences detected in California. The HARK reverse primer 5'  
128 ATATGGCGCCGTATTAGTAGAAACAAGGGTGT TTTT 3' was first reported in Bragstad  
129 *et al.* [13]. The 25  $\mu$ L PCR reaction used 0.08 U Amplitaq Gold polymerase (Invitrogen,  
130 Carlsbad CA) and 10x buffer without  $MgCl_2$ , 1.5 mM  $MgCl_2$ , 0.2 mM dNTP mix, 0.6  $\mu$ M  
131 of each primer, and 7  $\mu$ L of RNA extract from each sample. The PCR conditions were  
132 10 min at 95°C, followed by 45 cycles of 94°C for 1 min, 58°C for 1 min, and 72°C for 1  
133 min, with a final extension of 72°C for 7 min. Following electrophoresis on a 1.5%  
134 agarose gel, the 640 bp band was excised and purified using a QIAquick gel extraction  
135 kit (Qiagen, Valencia, CA) with an elution volume of 30  $\mu$ L. Direct Sanger sequencing of  
136 the amplicons was performed using the HARK reverse primer. Sequences were  
137 BLASTed (<http://www.ncbi.nlm.nih.gov/BLAST>) to identify the most similar HA  
138 sequences in GenBank. Whole-genome sequencing was next performed from samples  
139 where HA sequencing was successful using methods described previously [14].

140

141 *Phylogenetic analyses.* Phylogenetic analyses for all eight IAV segments were  
142 performed. We downloaded all available human A(H1N1)pdm09 sequences sampled  
143 between January 2016 and December 2021 from the EpiFlu database hosted by the  
144 Global Initiative on Sharing All Influenza Data (GISAID; [platform.gisaid.org](http://platform.gisaid.org)) that were  
145 available on July 1, 2022. We removed all sequences missing an exact sampling date,  
146 duplicates (by strain names) and those with non-completed genome segments.  
147 Sequences were grouped according to each geographic location (South America, North  
148 America, Europe, Africa, Asia and Oceania) and by year (2016, 2017, 2018, 2019,  
149 2020, 2021). CD-HIT v4.8.1 was then used to remove highly similar sequences (sharing  
150 99-100% nucleotide identity) [15]. This allowed us to downsample the datasets and

151 select representative sequences from each group to analyze genetic diversity.  
152 Additionally, two available H1N1pdm09 sequences from NES in 2010 were included in  
153 the analyses along with a reference sequence set for the clade/subclade assignment.  
154 The reference dataset was prepared using a nomenclature method introduced by the  
155 European Centre for Disease Prevention and Control (ECDC) that classifies a genetic  
156 clade/subclade based on unique amino acid substitutions in the HA1 or HA2 proteins  
157 **(Supplementary Table 1)** [16]. Sequence alignments were constructed using MAFFT  
158 v7.490 [17]. The alignments were trimmed and only gene coding regions were used.  
159 Phylogenetic trees for each segment were constructed by the maximum likelihood (ML)  
160 method using IQ-TREE with substitution model selection (ModelFinder implemented in  
161 IQ-TREE) option and 1000 bootstraps [18].

162 The evolutionary relationships and timescale of the concatenated eight segments  
163 were inferred using a Bayesian Markov chain Monte Carlo (MCMC) method, as  
164 implemented in the BEAST v1.10.4 package [19]. The final dataset of 165 sequences  
165 were downsampled with the CD-HIT by geographic origin and year of sampling along  
166 with two available A(H1N1)pdm09 sequences sampled from NES in 2010 and the  
167 reference set. After the MAFFT aligning, we trimmed sequences to 13,154 bp. A strict  
168 molecular clock was used, under the general time reversible model allowing for rate  
169 heterogeneity among sites and proportion of invariable sites (GTR+G+I). The MCMC  
170 was run for 100 million iterations, with subsampling every 10,000 iterations at least two  
171 times. All parameters reached convergence, as assessed visually using Tracer v1.7.1  
172 [20], with statistical uncertainty reflected by values of the 95% Highest Posterior Density  
173 (HPD) interval. The initial 10% of the chain was removed as burn-in, and maximum  
174 clade credibility (MCC) tree was summarized using TreeAnnotator v1.10.4. The tree

175 was visualized and annotated using FigTree v1.4.4

176 (<http://tree.bio.ed.ac.uk/software/figtree>).

177

178 *Data reporting and statistical analyses.* Raw data showing serology results from

179 individual marine mammals are located at

180 <https://ucdavis.box.com/s/0mwgj8q4av0kb8xr5iuaec4tbgz6hnsq>. The GenBank

181 accession numbers for the 8 IAV genome segments sequenced from a Northern

182 elephant seal, IAV A/elephantseal/California/ES4506NS/2019(H1N1) are MW132314

183 and MW132331-132337. Rates of ELISA seropositivity were compared using Chi-

184 squared statistics with Yates' correction. P values <0.05 were considered statistically

185 significant. Statistical analyses were performed using GraphPad Prism.

186

## 187 **Results**

188

189 After the first detection of pandemic H1N1 IAV in two NES in 2010, we performed

190 continuous IAV surveillance in multiple pinniped species stranded on the California

191 coast and admitted to TMMC from 2011-2019. Our approach entails screening marine

192 mammals for IAV antibody in serum via ELISA and sometimes HI as well as viral RNA

193 in nasal and rectal swabs after RNA isolation and RRT-PCR. We tested at least 800

194 swabs samples annually. Most samples were from CSL (*Zalophus californianus*), NES

195 (*Mirounga angustirostris*), PHS (*Phoca vitulina*), and Northern fur seals (*Callorhinus*

196 *ursinus*). From 2011-2018, we detected 13 IAV RNA-positive nasal and/or rectal swabs

197 (0 in 2011, 1 in 2012, 0 in 2013-2015, 5 in 2016, 3 in 2017, and 4 in 2018). In 2019, we

198 detected 10 IAV RNA-positive nasal and/or rectal swabs, 9 of which were from animals

199 admitted during a 6-week period between March 12 and April 27, 2019 (**Table 1**; 2016-



200 2018 data included for historical reference). Given the increased number of IAV RNA  
 201 detections in 2018-2019 compared to 2011-2018 and the temporal clustering of IAV  
 202 RNA detections in spring 2019, this manuscript focuses on data from animals stranded  
 203 during the 2018- 2019 period.

204

| Animal ID | IAV RRT-PCR Ct | ELISA |        | Mean HI titer for second sample |     |     | Age Class | Sex | Species | Strand County   | Strand City          | Admit Date | Disposition |                   | Diagnosis                           | Cause of Death                   |
|-----------|----------------|-------|--------|---------------------------------|-----|-----|-----------|-----|---------|-----------------|----------------------|------------|-------------|-------------------|-------------------------------------|----------------------------------|
|           |                | admit | second | H1                              | H3  | H5  |           |     |         |                 |                      |            | Date        | Status            |                                     |                                  |
| CSL-13160 | 37.6           | Neg   | ND     | ND                              | ND  | ND  | Subadult  | F   | CSL     | San Mateo       | Pescadero            | 06/05/2016 | 06/18/2016  | Died in Treatment | malnutrition                        | malnutrition                     |
| CSL-13161 | 42.0           | Neg   | ND     | ND                              | ND  | ND  | Adult     | F   | CSL     | Santa Cruz      | Watsonville          | 06/06/2016 | 06/10/2016  | Euthanasia        | N/A                                 | euthanasia, domoic acid toxicity |
| CSL-13198 | 37.7           | Neg   | ND     | ND                              | ND  | ND  | Yearling  | F   | CSL     | Monterey        | Moss Landing         | 07/04/2016 | 07/05/2016  | Euthanasia        | N/A                                 | gunshot                          |
| CSL-13203 | 36.8           | NA    | ND     | ND                              | ND  | ND  | Adult     | F   | CSL     | San Luis Obispo | Morro Bay            | 07/12/2016 | 07/31/2016  | Euthanasia        | N/A                                 | domoic acid toxicity             |
| CSL-13207 | 37.1           | NA    | ND     | ND                              | ND  | ND  | Adult     | F   | CSL     | Monterey        | Pacific Grove        | 07/14/2016 | 07/16/2016  | Died in Treatment | N/A                                 | renal failure, neoplasia         |
| ES-4068   | 36.5           | Neg   | ND     | ND                              | ND  | ND  | Pup       | M   | NES     | Santa Cruz      | Davenport            | 01/24/2017 | 06/07/2017  | Released          | malnutrition, maternal separation   | N/A                              |
| ES-4121   | 35.8           | Neg   | ND     | ND                              | ND  | ND  | Pup       | M   | NES     | Monterey        | Pacific Grove        | 03/20/2017 | 04/27/2017  | Released          | malnutrition                        | N/A                              |
| NFS-435   | 35.7           | Neg   | ND     | ND                              | ND  | ND  | Pup       | F   | NFS     | Monterey        | Monterey             | 12/21/2017 | 02/02/2018  | Released          | malnutrition                        | N/A                              |
| ES-4254   | 35.4           | Neg   | ND     | ND                              | ND  | ND  | Pup       | F   | NES     | Santa Cruz      | Davenport            | 01/22/2018 | 06/22/2018  | Released          | maternal, separation, malnutrition, | N/A                              |
| HS-2754   | 35.3           | Neg   | ND     | ND                              | ND  | ND  | Pup       | M   | PHS     | Marin           | Bolinas              | 02/14/2018 | 02/14/2018  | Died in Treatment | N/A                                 | prematurity, maternal separation |
| ES-4311   | 36.5           | Pos   | ND     | 32*                             | 8*  | <8* | Pup       | M   | NES     | Monterey        | Monterey             | 03/26/2018 | 06/22/2018  | Released          | malnutrition                        | N/A                              |
| CSL-14130 | 37.6           | Neg   | ND     | ND                              | ND  | ND  | Pup       | M   | CSL     | San Mateo       | Princeton-by-the-Sea | 12/17/2018 | 01/22/2019  | Released          | malnutrition, maternal separation   | N/A                              |
| ES-4424   | 35.8           | Pos   | ND     | ND                              | ND  | ND  | Pup       | F   | NES     | San Luis Obispo | San Simeon           | 3/12/2019  | 4/24/2019   | Released          | malnutrition                        | N/A                              |
| ES-4506   | 20.9           | Neg   | ND     | ND                              | ND  | ND  | Pup       | M   | NES     | San Luis Obispo | Avila Beach          | 4/9/2019   | 7/17/2019   | Released          | malnutrition, oil                   | N/A                              |
| ES-4507   | 28.6           | Pos   | ND     | 8*                              | <8* | <8* | Pup       | M   | NES     | Santa Cruz      | Live Oak             | 4/9/2019   | 4/26/2019   | Euthanized        | malnutrition, otostrongyliasis      | otostrongyliasis                 |

205

|         |      |     |     |      |    |    |     |   |     |                 |               |           |           |            |                                         |                   |
|---------|------|-----|-----|------|----|----|-----|---|-----|-----------------|---------------|-----------|-----------|------------|-----------------------------------------|-------------------|
| ES-4509 | 32.4 | Neg | Pos | 64   | 11 | <8 | Pup | F | NES | San Mateo       | Pacifica      | 4/10/2019 | 5/21/2019 | Released   | malnutrition                            | N/A               |
| ES-4523 | 34.7 | Pos | Pos | 128  | <8 | <8 | Pup | F | NES | Monterey        | Pacific Grove | 4/14/2019 | 7/17/2019 | Released   | malnutrition                            | N/A               |
| ES-4527 | 32.6 | Neg | Pos | 256  | <8 | <8 | Pup | F | NES | Sonoma          | Fort Ross     | 4/15/2019 | 6/12/2019 | Released   | malnutrition, otostrongyliasis, abscess | N/A               |
| ES-4530 | 32.1 | Neg | Neg | ND   | ND | ND | Pup | M | NES | San Mateo       | Montara       | 4/16/2019 | 6/1/2019  | Released   | malnutrition, otostrongyliasis          | N/A               |
| ES-4538 | 28.2 | Pos | ND  | 128* | <8 | <8 | Pup | F | NES | San Luis Obispo | San Simeon    | 4/20/2019 | 6/12/2019 | Released   | malnutrition, trauma, unknown           | N/A               |
| ES-4539 | 24.2 | Neg | Neg | >512 | <8 | <8 | Pup | F | NES | San Luis Obispo | Cayucos       | 4/20/2019 | 5/2/2019  | Euthanized | malnutrition, trauma, unknown           | congenital defect |
| HS-2859 | 32.0 | Neg | ND  | ND   | ND | ND | Pup | F | PHS | San Mateo       | Pacifica      | 4/27/2019 | 6/18/2019 | Released   | maternal separation, malnutrition       | N/A               |

206

207 **Table 1: Metadata for IAV RNA positive marine mammals on the California Coast,**  
 208 **2016-2019.** The second sample on which ELISA or HI was performed upon was  
 209 collected between 2 to 3 weeks after the admit sample. CSL is California sea lion, NES  
 210 is northern elephant seal, NFS is northern fur seal, PHS is Pacific harbor seal. ND  
 211 indicates no sample was available for testing, F is female, M is male, N/A indicates not  
 212 applicable, Neg is negative, Pos is positive, HI is hemagglutination inhibition, ELISA is  
 213 enzyme linked immunosorbent assay, RRT-PCR is real time reverse transcription

214 polymerase chain reaction, Ct is cycle threshold. Asterisks indicate that HI was  
215 performed on the first sample since for some animals a second sample was not  
216 available. The number after each H designation indicates the hemagglutinin subtype  
217 used in the HI assay. A non-HI reactive sample is annotated at <8, where a 1:8 dilution  
218 was the lowest tested. Each RRT-PCR Ct and ELISA represent testing of a single  
219 replicate for each sample. For HI, each sample was tested in triplicate and the mean HI  
220 titer is shown.

221  
222 We detected IAV NP antibody by ELISA in 42% (2018) and 54% (2019) of NES, in 6%  
223 (2018) and 0% (2019) of PHS, and in 6% (2018) and 21% (2019) of CSL (**Figure 1A**).  
224 There was no difference in the overall rate of ELISA seropositivity between 2018 and  
225 2019 in NES or PHS ( $p>0.05$ , Chi-squared). The rate of ELISA seropositivity in CSL  
226 was significantly higher in 2019 compared to 2018 ( $p=0.04$ , Chi-squared). Pups and  
227 weanlings represented most stranded animals and had higher rates of IAV NP antibody  
228 compared to juveniles, yearlings, and adults. HI was performed on IAV ELISA-reactive  
229 sera from 70 animals (**Table 2**). Each serum sample was tested by HI using 3 IAV  
230 subtypes: H1N1 and H3N8, selected since they were previously reported in marine  
231 mammals, and H5N2 which is common in water birds that share shore environments  
232 with marine mammals. Of the 70 marine mammals for which HI titers were determined,  
233 60 had H1N1 HI antibody titers at least 4-fold higher than H3N8 and H5N2 titers. Seven  
234 were H1N1 reactive above the limit of detection of 8 but did not have titers that were 4-  
235 fold higher than the other two subtypes. Two samples had detectable H3N8 titers that  
236 were less than 4-fold higher than H1N1 titers, and one sample was not reactive with any  
237 IAV subtype by HI. Most (85% in 2018, 93% in 2019) ELISA-reactive NES sera also  
238 contained detectable H1N1 HI titers. The IAV NP ELISA positivity rate was highest in  
239 the winter months, exceeding 20% from February to April in 2018 and from February to  
240 June in 2019, and peaking near 50% in March of both years (**Figure 1B**). This seasonal

241 bias in seropositivity may reflect higher sampling in winter, where NES are pelagic the  
 242 rest of the year and therefore not available for sampling. Together these data indicate  
 243 that H1N1 IAV infection is common in multiple pinniped species as evidenced by  
 244 infection- or maternally-derived antibodies detected in pups and weanlings.

245

246 **Fig 1. Influenza A virus antibody detections in marine mammals, California, 2018-**  
 247 **2019. A)** Rates of IAV nucleoprotein (NP) enzyme-linked immunosorbent assay (ELISA)  
 248 and H1N1 hemagglutination inhibition (HI) reactivity in marine mammal sera from  
 249 January 2018 to July 2019. ELISA antibody detections by age class of marine mammals  
 250 are also shown. nd indicates not done. **B)** IAV NP ELISA seroprevalence by month for  
 251 the study period.

252

| Animal ID | Mean HI titer |      |      | Animal ID        | Mean HI titer |      |      |
|-----------|---------------|------|------|------------------|---------------|------|------|
|           | H1N1          | H3N8 | H5N2 |                  | H1N1          | H3N8 | H5N2 |
| ES-4266   | 256           | <8   | <8   | ES-4505          | 512           | <8   | <8   |
| ES-4280   | 352           | 11   | 8    | ES-4507          | 8             | <8   | <8   |
| ES-4284   | >512          | <8   | <8   | ES-4509          | 48            | 11   | <8   |
| ES-4298   | 64            | 16   | <8   | ES-4510          | 8             | <8   | <8   |
| ES-4302   | 128           | 32   | 32   | ES-4511          | 256           | 21   | <8   |
| ES-4307   | 8             | 16   | 8    | ES-4513          | 48            | <8   | <8   |
| ES-4310   | 16            | <8   | <8   | ES-4514          | 256           | <8   | <8   |
| ES-4311   | 32            | 8    | <8   | ES-4516          | 256           | <8   | <8   |
| ES-4314   | 128           | <8   | <8   | ES-4518          | 512           | <8   | <8   |
| ES-4318   | 128           | 8    | <8   | ES-4520          | 256           | <8   | <8   |
| ES-4319   | 64            | 8    | <8   | ES-4521          | 256           | <8   | <8   |
| ES-4324   | 128           | <8   | <8   | ES-4523          | 256           | <8   | <8   |
| ES-4325   | 0             | 8    | <8   | ES-4524          | 128           | <8   | <8   |
| ES-4327   | 64            | <8   | <8   | ES-4526          | 512           | <8   | <8   |
| ES-4330   | 16            | <8   | <8   | ES-4527          | 256           | <8   | <8   |
| ES-4333   | 128           | <8   | <8   | ES-4529          | 128           | <8   | <8   |
| ES-4335   | 16            | <8   | <8   | ES-4531          | 128           | <8   | <8   |
| ES-4339   | 32            | 32   | <8   | ES-4532          | 8             | <8   | <8   |
| ES-4342   | 16            | 8    | <8   | ES-4535          | 256           | <8   | <8   |
| ES-4343   | 128           | <8   | <8   | ES-4537          | 128           | <8   | <8   |
| ES-4347   | 128           | <8   | <8   | ES-4538          | 128           | <8   | <8   |
| ES-4348   | 128           | 32   | 32   | ES-4539          | >512          | <8   | <8   |
| ES-4349   | 4             | <8   | <8   | ES-4542          | 64            | <8   | <8   |
| ES-4354   | 256           | <8   | <8   | ES-4543          | 512           | 8    | <8   |
| ES-4357   | <8            | <8   | <8   | ES-4544          | 256           | <8   | <8   |
| ES-4373   | 512           | 32   | 0    | ES-4545          | 512           | <8   | <8   |
| ES-4383   | 427           | 48   | 16   | ES-4550          | 128           | <8   | <8   |
| ES-4387   | 64            | <8   | <8   | ES-4552          | 64            | <8   | <8   |
| ES-4389   | 512           | <8   | <8   | ES-4558          | 512           | 11   | <8   |
| ES-4470   | 128           | <8   | <8   | ES-4562          | 320           | 21   | 16   |
| ES-4472   | 128           | <8   | <8   | ES-4564          | 256           | 8    | 8    |
| ES-4477   | 384           | <8   | <8   | HS-2861          | <8            | 8    | <8   |
| ES-4479   | 512           | <8   | <8   | HS-2883          | >512          | 32   | 32   |
| ES-4482   | 256           | <8   | <8   | H1N1 positive    | >512          | <8   | <8   |
| ES-4490   | 256           | <8   | <8   | Negative control | <8            | <8   | <8   |

253

254 **Table 2: IAV antibody hemagglutination inhibition (HI) assays detections in**  
255 **ELISA-IAV reactive Northern elephant seals on California coasts in 2018-2019.**

256 Animals shaded in grey also contained IAV RNA detectable by RRT-PCR; the same HI  
257 data for those animals is also reproduced in Table 2 for comparison with RNA values.  
258 Ferret serum from an animal that was experimentally inoculated with IAV H1N1 was  
259 used as a positive control. Positive control sera for H3N8 and H5N2 were not available.  
260 The negative control consisted of serum diluent.

261  
262 In 2018, we assayed 1385 nasal and rectal swabs from 969 CSL, 332 NES, and 84  
263 PHS; four contained detectable IAV RNA. In 2019, we assayed 822 nasal and rectal  
264 swabs; 539 from CSL, 201 from NES, and 82 from PHS. From the 2019 samples, we  
265 detected IAV RNA in the nasal swab from one Northern elephant seal, combined nasal  
266 and rectal swabs from additional eight NES, and one nasal swab from a PHS,  
267 representing 10/822 (1.2%) of the 2019 total from all three species. In 2019, The IAV  
268 RNA-positive animals all stranded in March and April. All animals were pups, and six of  
269 the ten animals were female. All showed signs of malnutrition and most were released  
270 after rehabilitation. For the two animals that were euthanized, the cause of death was  
271 not IAV-related (**Table 1**). Each sample yielded a positive IAV matrix gene RRT-PCR  
272 result, with Ct values ranging from 20.9 to 35.8. The stranding locations of the 10 IAV  
273 RRT-PCR positive marine mammals from 2019 spanned the California coast (**Figure 2**).  
274 Unfortunately, we were unsuccessful isolating infectious IAV from any RRT-PCR  
275 positive swab samples after inoculation into embryonated chicken eggs and MDCK  
276 cells. We amplified and sequenced a 640 bp portion of the IAV HA gene from the nasal  
277 swab from one NES (ES-4506NS) that exhibited the lowest RRT-PCR Ct value (**Table**  
278 **1**). The complete IAV genome was then obtained by sequencing multi-segment RT-  
279 PCR reactions generated from the nasal swab sample. This sequence was named  
280 A/Northern elephant seal/California/ES4506NS/2019(H1N1). The serum sample from

281 that animal at admission to TMMC was ELISA IAV NP antibody negative. Unfortunately,  
282 the second sample was not collected to evaluate whether seroconversion occurred  
283 during rehabilitation.

284

285 **Fig 2. Influenza A virus RNA detections in marine mammals, California, 2019.** Map  
286 shows locations of stranded marine mammals on California coasts that contained IAV  
287 RNA in nasal swabs. The tree is a time-scaled Maximum Clade Credibility phylogeny  
288 representing concatenated coding regions of all 8 A(H1N1)pdm09 IAV segments. A total  
289 of 165 representative pandemic H1N1 isolates sampled globally are included in the tree.  
290 Sequences in black text are from humans. The sequence in blue text shows the position  
291 of the IAV genome from a Northern elephant seal in this study. Green text shows  
292 sequences of IAV from other seals not part of this study that were sampled in 2010. The  
293 yellow shading shows clade 6B.1A/subclade 6B.1A.1 IAV, represented by the reference  
294 2019-2020 vaccine virus A/Brisbane/02/2018. Bayesian posterior probability values  
295 >70% are included for key nodes. The tree is rooted through the assumption of a strict  
296 molecular clock, such that tip times represent the time (year/month/day) of sampling.  
297 The source of the Northern elephant seal illustration was  
298 [https://www.sciencedirect.com/topics/agricultural-and-biological-sciences/northern-](https://www.sciencedirect.com/topics/agricultural-and-biological-sciences/northern-elephant-seal)  
299 [elephant-seal](https://www.sciencedirect.com/topics/agricultural-and-biological-sciences/northern-elephant-seal). The figure was generated using Biorender.

300 The IAV genome detected in the NES in this study is closely related to pandemic  
301 A(H1N1)pdm09 virus that circulated in humans during the 2018-19 influenza season  
302 and is derived from clade 6B.1A/subclade 6B.1A1. A Maximum Clade Credibility  
303 phylogeny constructed from the concatenated coding regions of all eight segments  
304 (**Figure 2**) shows that the closest related strains are from the United States (e.g.  
305 A/Pennsylvania/541/2018 and A/Michigan/59/2019) with highest nucleotide identity of  
306 99.5% across the whole genome and supported by >90% Bayesian posterior  
307 probabilities. The A/Northern elephant seal/California/ES4506NS/2019(H1N1) from the  
308 NES in this study belongs to clade 6B.1A/subclade 6B.1A.1, a sub-group of

309 H1N1pdm09 viruses that began circulating in the 2018/19 influenza season and which  
310 are characterized by a S183P mutation in the hemagglutinin (HA) protein. This subclade  
311 was contemporaneously circulating in the Northern Hemisphere in 2018/19 influenza  
312 season and is represented by the reference strain 2019-2020 vaccine virus  
313 A/Brisbane/02/2018. Separate analyses of each of the eight segments (PB2, PB1, PA,  
314 H1, NP, N1, M, and NS) of the H1N1 virus from the NES in this study was inferred using  
315 the H1 classified phylogeny as a reference and shows that all gene segments group  
316 within the same clade (**Supplementary Figures 1-8**). No reassortant events were  
317 detected in the H1N1pdm09 NES virus in our analyses. The predicted HA amino acid  
318 sequence of the NES virus described here is identical to the consensus of concurrently  
319 circulating human strains in the 6B.1A.1 subclade. To predict the timeframe of a  
320 possible spillover event(s) into the NES, the time of the most recent common ancestor  
321 (tMRCA) was estimated for both the concatenated coding region sequence and the HA  
322 alone. For the concatenated H1N1pdm09 genome, the tMRCA between the NES IAV  
323 and the closest human isolate A/Pennsylvania/541/2018 IAV was estimated to be  
324 November 19, 2018 (2018.8695 decimal year) with a 95% Highest Posterior Density  
325 (HPD) October 20, 2018 – December 6, 2018 (2018.8047 - 2018.9332). The tMRCA for  
326 the HA alone was in the same timeframe and comparably estimated to be November  
327 11, 2018, ranging between the end of September and late December 2018 (2018.8642  
328 decimal year (95% HPD 2018.7402 - 2018.9814) (**Supplementary Figure S9**).

329

## 330 **Discussion**

331

332 This study represents the second detection of pandemic H1N1pdm09 IAV RNA in  
333 marine mammals in California. Like the 2010 detections in two NES, the locations and

334 exact timing of exposures are not known. In this study, samples from other species, like  
335 gulls or shore birds sharing near or offshore environments with pinnipeds, were not  
336 available for IAV testing.

337

338 Consistent with 2010, where two IAV RNA-positive NES were detected in two  
339 consecutive weeks in late April and early May [6], all the IAV RNA-positive animals in  
340 this study were detected in spring (March and April 2019), suggesting that H1N1pdm09  
341 IAV circulation in these species coincides with the period weaned pups are clustered on  
342 beaches at breeding sites for in spring before going to sea. Unlike in 2010, where both  
343 IAV detections were in adult female NES, half of the the IAV RNA-positive animals in  
344 2019 were pups and were both male and female. Consistent with the 2010 report, none  
345 of the animals in 2019 showed signs of recognized IAV-like disease, suggesting that  
346 infection is asymptomatic or self-limiting. A caveat of our study is that our surveillance  
347 approach employs opportunistic sampling of stranded marine mammals, which may not  
348 represent IAV circulation patterns, timing, or disease manifestations in the entire  
349 population. The species and age bias may reflect sampling bias where in spring TMMC  
350 rescues mostly young NES and PHS pups that have been separated from their  
351 mothers, while in summer rescued animals are mostly one year old CSL showing signs  
352 of malnutrition or leptospirosis, cancer, domoic acid toxicity, or protozoal infections.  
353 Admission rates vary for each species and TMMC does not re-capture released  
354 animals. Seals that die on the beaches at breeding colonies in California are not  
355 examined to ascertain the cause of death, so influenza-related mortalities similar to  
356 those reported in harbor seals in New England and in the North Sea [1,2,21], may go  
357 undetected.

358

359 IAV antibody detection in three pinniped species in 2018 and 2019 suggests that IAV  
360 infections occurred in this period or that antibody titers from infections prior to 2018 are  
361 durable. The higher rate of antibody detections in NES, exceeding 40% in both years,  
362 compared to lower rates in CSL or PHS, suggests that NES are the most frequently  
363 infected of the three species, similar to previous observations [6,22]. Frequent detection  
364 of IAV antibody in pups of all three species suggests either prior IAV exposure or  
365 transfer of maternal antibody from IAV-infected mothers [22]. The longevity of IAV  
366 maternal antibody in young marine mammals is not known. Three of the IAV RNA-  
367 positive animals seroconverted in the interval between blood collected at admission and  
368 collection of the second sample, suggestive of recent infection. Detection of IAV NP  
369 antibody in serum at intake from four out of 10 IAV RNA positive pups suggests that the  
370 magnitude or composition of IAV antibody was not sufficient to prevent IAV infection,  
371 resulting in viral RNA replication, or, alternately, that sampling occurred during infection  
372 before IAV clearance but after the production of IAV NP antibody. Our previous explant  
373 studies show that respiratory tract tissues from recently euthanized marine mammals,  
374 including NES, support IAV infection with multiple subtypes, including H1N1 [23].

375

376 The closest genetic identity of the 2019 NES IAV genome with contemporary pandemic  
377 human H1N1 shows that NES can be infected with pandemic human H1N1 viruses. The  
378 distant relatedness of the 2019 NES IAV genome with the two 2010 NES IAV genomes  
379 does not support the maintenance of a NES-exclusive IAV lineage. In contrast, the  
380 estimated time of most recent common ancestor, November, 2018, together with the  
381 phylogenetic analyses, suggested that the spillover event likely happened during the  
382 2018/19 human influenza season since the NES virus closely matches the  
383 contemporaneously circulating human A/(H1N1)pdm09 6B.1A.1 subclade. This clade



384 derived from the main clade 6B.1, or the A/Michigan/45/2015 vaccine virus relative  
385 clade. Since spring 2019, several genetic subclades within the 6B.1 clade were defined  
386 by specific amino acid substitutions in the HA and a new clade designated as 6B.1A  
387 became dominant. The 6B.1A clade contributed to a peak of influenza cases in humans  
388 in the 2018/19 season, where A/(H1N1)pdm09 represented 28% of cases [24]. After  
389 emergence of clade 6B.1A, many additional virus subclades that emerged encode a  
390 range of the HA amino acid substitutions, which were then assigned to 6B.1A1 - 6B.1A7  
391 [16]. While the spillover event and intermediate infection chains are not discernable, the  
392 finding that A/Northern elephant seal/California/ES4506NS/2019(H1N1) genetically  
393 matches the 2019 human 6B.1A.1 subclade in North America suggests that the spillover  
394 event occurred in the same influenza season, consistent with the tMRCA analysis.  
395 Subclade 6B.1A.1 viruses are characterized by S183P in HA, a mutation that occurs via  
396 mouse adaptation of A/(H1N1)pdm09 viruses, and may enhance receptor binding to  
397 bronchial  $\alpha$ -2,3 sialic acid (SA)-linked receptors at the expense of decreased binding to  
398  $\alpha$ 2,6 SA-linked receptors [25]. Whether this mutation contributed mechanistically to the  
399 observed spillover and infection of NES with 6B.1A.1 A/(H1N1)pdm09 in the 2018/19  
400 human influenza season is not known.

401  
402 The mechanism(s) by which IAV is transmitted from humans into pinnipeds is also  
403 unclear. Generally, there are three main routes of influenza virus transmission: airborne,  
404 large droplets, and contact (direct and indirect contact) [26]. Notably, influenza  
405 A(H1N1)pdm09 virus has been detected in stool samples with positive viral culture from  
406 hospitalized human patients, suggesting viable shedding of the virus through feces  
407 [27]. In this study, exposure of the NES to human A(H1N1)pdm09 virus could have  
408 occurred through feces discharged from sewage-dumping ships, urban run-off, or on-

409 shore exposure to another IAV reservoir also infected with human H1N1, including other  
410 seals or waterbirds. The tMRCA between the NES sequence and the closest human  
411 sequence (A/Pennsylvania/541/2018) was estimated at November 19, 2018 (ranging  
412 between October and December 2018) suggesting that the cross-species spillover likely  
413 happened during this timeframe.

414

415 In summary this study provides evidence of continued cross species transmission of  
416 pandemic influenza A virus from humans to free-ranging pinnipeds on the shores of  
417 California.

418

419 **Acknowledgements** We acknowledge Jesierose Poblacion, Carlos Rios, Christine  
420 Fontaine, Barbie Halaska, and the veterinary staff at TMMC, who conducted marine  
421 mammal sampling and provided swabs and serum under NOAA permit 18786-04. We  
422 thank Wendy Puryear, Nichola Hill, and Jonathan Runstadler at Tufts University, who  
423 provided HI protocols, and Randy Albrecht at the Icahn School of Medicine at Mount  
424 Sinai, who provided control sera for HI assays. Hon Ip at the National Wildlife Health  
425 Center provided the IAV H3N8 isolate. We are grateful to all authors from the originating  
426 laboratories responsible for obtaining the human specimens, as well as the submitting  
427 laboratories where the genome data were generated and shared via GISAID.

428

429 **Funding Acknowledgements:** This project was funded by the National Institutes of  
430 Health Centers of Excellence for Influenza Research and Surveillance (CEIRS)  
431 HHSN272201400008C, HHSN266200700010C, and HHSN272201400006C. Additional  
432 support was provided by the NIGMS Alaska INBRE program P20GM103395. GK and IG  
433 are supported by grants from the Wellcome Trust (Refs: 207498/Z/17/Z and

434 206298/B/17/Z). Financial support for JB was provided by the Students Training in  
435 Advanced Research (STAR) Program through a UC Davis School of Veterinary  
436 Medicine Endowment Fund. The funders had no role in study design, data collection  
437 and analysis, decision to publish, or preparation of the manuscript.

438

#### 439 **Author Contributions**

440 Conceptualization: MP, LLC

441 Data Curation: MP, LLC, SC

442 Formal Analysis: MP, JB, LLC, GK

443 Funding Acquisition: LLC, IG

444 Investigation: PJD, JD, HVB, MP, JB, GK

445 Methodology: MP, LLC, GK

446 Project Administration: LLC

447 Resources: LLC

448 Supervision: LLC, PJD, IG

449 Validation: MP, SC

450 Visualization: ALR, LC, GK

451 Writing- Original Draft: MP, LLC

452 Writing- Reviewing and Editing: MP, LLC, AK, ALR, EB, PJD, GK, ALR, EB, IG, HB

453

## 454 **References**

455

- 456 1. Anthony, S.J; Leger, J.A.St; Pugliares, K; Ip, H.S; Chan, J.M; Carpenter, Z.W; Navarrete-  
457 Macias, I; Sanchez-Leon, I; Saliki, J.T; Pedersen, J; Karesh, W; Daszak, P; Rabadan, R;  
458 Rowles, T; Lipkin WI. Emergence of fatal avian influenza in New England harbour seals.  
459 *mBio*. 2012. doi:10.1128/mBio.00166-12.Editor
- 460 2. Callan RJ, Early G, Kida H, Hinshaw VS. The appearance of H3 influenza viruses in  
461 seals. *Journal of General Virology*. 1995;76: 199–203. doi:10.1099/0022-1317-76-1-199
- 462 3. Geraci JR, Aubin DJS, Barker IK, Webster RG, Hinshaw VS, Bean WJ, et al. Mass  
463 mortality of harbor seals: pneumonia associated with influenza A virus. *Science*.  
464 1982;215: 1129–1131. doi:10.1126/SCIENCE.7063847
- 465 4. Hinshaw VS, Bean WJ, Webster RG, Rehg JE, Fiorelli P, Early G, et al. Are seals  
466 frequently infected with avian influenza viruses? *J Virol*. 1984;51: 863–865.  
467 doi:10.1128/JVI.51.3.863-865.1984
- 468 5. Boyce WM, Mena I, Yochem PK, Gulland FMD, Garcíá-Sastre A, Moreno N, et al.  
469 Influenza A(H1N1)pdm09 virus infection in marine mammals in California. *Emerging*  
470 *Microbes and Infections*. 2013. doi:10.1038/emi.2013.40
- 471 6. Goldstein T, Mena I, Anthony SJ, Medina R, Robinson PW, Greig DJ, et al. Pandemic  
472 H1N1 Influenza Isolated from Free-Ranging Northern Elephant Seals in 2010 off the  
473 Central California Coast. *PLoS One*. 2013. doi:10.1371/journal.pone.0062259
- 474 7. Li ZN, Ip HS, Trost JF, LeAnn White C, Murray MJ, Carney PJ, et al. Serologic evidence  
475 of influenza A(H1N1)pdm09 virus infection in northern sea otters. *Emerg Infect Dis*.  
476 2014;20: 915–917. doi:10.3201/EID2005.131890
- 477 8. Lebarbenchon C, Brown JD, Luttrell MP, Stallknecht DE. Comparison of two commercial  
478 enzyme-linked immunosorbent assays for detection of Influenza A virus antibodies. *J Vet*  
479 *Diagn Invest*. 2012;24: 161–165. doi:10.1177/1040638711416626

- 480 9. Pedersen JC. Hemagglutination-inhibition assay for influenza virus subtype identification  
481 and the detection and quantitation of serum antibodies to influenza virus. *Methods Mol*  
482 *Biol.* 2014;1161: 11–25. doi:10.1007/978-1-4939-0758-8\_2
- 483 10. Puryear WB, Keogh M, Hill N, Moxley J, Josephson E, Davis KR, et al. Prevalence of  
484 influenza A virus in live-captured North Atlantic gray seals: a possible wild reservoir.  
485 *Emerg Microbes Infect.* 2016;5. doi:10.1038/EMI.2016.77
- 486 11. Spackman E, Senne DA, Myers TJ, Bulaga LL, Garber LP, Perdue ML, et al.  
487 Development of a real-time reverse transcriptase PCR assay for type A influenza virus  
488 and the avian H5 and H7 hemagglutinin subtypes. *J Clin Microbiol.* 2002.  
489 doi:10.1128/JCM.40.9.3256-3260.2002
- 490 12. Phipps LP, Essen SC, Brown IH. Genetic subtyping of influenza A viruses using RT-PCR  
491 with a single set of primers based on conserved sequences within the HA2 coding region.  
492 *J Virol Methods.* 2004;122: 119–122. doi:10.1016/j.jviromet.2004.08.008
- 493 13. Bragstad K, Nielsen LP, Fomsgaard A. The evolution of human influenza A viruses from  
494 1999 to 2006: a complete genome study. *Virology.* 2008;5. doi:10.1186/1743-422X-5-40
- 495 14. Mena I, Nelson MI, Quezada-Monroy F, Dutta J, Cortes-Fernández R, Lara-Puente JH, et  
496 al. Origins of the 2009 H1N1 influenza pandemic in swine in Mexico. *Elife.* 2016.  
497 doi:10.7554/eLife.16777
- 498 15. Li W, Godzik A. Cd-hit: a fast program for clustering and comparing large sets of protein  
499 or nucleotide sequences. *Bioinformatics.* 2006;22: 1658–1659.  
500 doi:10.1093/BIOINFORMATICS/BTL158
- 501 16. Ecdc. Influenza virus characterisation report - December 2019. 2019 [cited 5 Oct 2022].  
502 Available: [https://www.ecdc.europa.eu/sites/default/files/documents/influenza-virus-](https://www.ecdc.europa.eu/sites/default/files/documents/influenza-virus-characterisation-report-November-2019.pdf)  
503 [characterisation-report-November-2019.pdf](https://www.ecdc.europa.eu/sites/default/files/documents/influenza-virus-characterisation-report-November-2019.pdf)
- 504 17. Katoh K, Standley DM. MAFFT Multiple Sequence Alignment Software Version 7:  
505 Improvements in Performance and Usability. *Mol Biol Evol.* 2013;30: 772–780.  
506 doi:10.1093/MOLBEV/MST010

- 507 18. Nguyen LT, Schmidt HA, von Haeseler A, Minh BQ. IQ-TREE: a fast and effective  
508 stochastic algorithm for estimating maximum-likelihood phylogenies. *Mol Biol Evol.*  
509 2015;32: 268–274. doi:10.1093/MOLBEV/MSU300
- 510 19. Suchard MA, Lemey P, Baele G, Ayres DL, Drummond AJ, Rambaut A. Bayesian  
511 phylogenetic and phylodynamic data integration using BEAST 1.10. *Virus Evol.* 2018;4.  
512 doi:10.1093/VE/VEY016
- 513 20. Rambaut A, Drummond AJ, Xie D, Baele G, Suchard MA. Posterior Summarization in  
514 Bayesian Phylogenetics Using Tracer 1.7. *Syst Biol.* 2018;67: 901–904.  
515 doi:10.1093/SYSBIO/SYY032
- 516 21. Bodewes R, Bestebroer TM, van der Vries E, Verhagen JH, Herfst S, Koopmans MP, et  
517 al. Avian Influenza A(H10N7) virus-associated mass deaths among harbor seals. *Emerg*  
518 *Infect Dis.* 2015;21: 720–722. doi:10.3201/EID2104.141675
- 519 22. Boyce WM, Mena I, Yochem PK, Gulland FMD, Garcíá-Sastre A, Moreno N, et al.  
520 Influenza A(H1N1)pdm09 virus infection in marine mammals in California. *Emerg*  
521 *Microbes Infect.* 2013;2. doi:10.1038/EMI.2013.40
- 522 23. Liu H, Plancarte M, Ball EE, Weiss CM, Gonzales-Viera O, Holcomb K, et al. Respiratory  
523 Tract Explant Infection Dynamics of Influenza A Virus in California Sea Lions, Northern  
524 Elephant Seals, and Rhesus Macaques. *J Virol.* 2021;95. doi:10.1128/jvi.00403-21
- 525 24. Centers for Disease Control and Prevention. 2018-2019 Influenza Season Summary  
526 Weeks 21 to 39, May 19 - September 28, 2019. In:  
527 <https://www.cdc.gov/flu/weekly/weeklyarchives2018-2019/Week39.htm>.
- 528 25. Ilyushina NA, Khalenkov AM, Seiler JP, Forrest HL, Bovin N v., Marjuki H, et al.  
529 Adaptation of pandemic H1N1 influenza viruses in mice. *J Virol.* 2010;84: 8607–8616.  
530 doi:10.1128/JVI.00159-10
- 531 26. Weber TP, Stilianakis NI. Inactivation of influenza A viruses in the environment and  
532 modes of transmission: a critical review. *J Infect.* 2008;57: 361–373.  
533 doi:10.1016/J.JINF.2008.08.013

- 534 27. Yoo SJ, Moon SJ, Kuak EY, Yoo HM, Kim CK, Chey MJ, et al. Frequent detection of  
535 pandemic (H1N1) 2009 virus in stools of hospitalized patients. *J Clin Microbiol.* 2010;48:  
536 2314–2315. doi:10.1128/JCM.00325-10  
537  
538

**A**

| Species       |                               | Northern elephant seal                                     | Pacific harbor seal | California sea lion |
|---------------|-------------------------------|------------------------------------------------------------|---------------------|---------------------|
| Year          | Assay                         | % animals with detectable antibody (number positive/total) |                     |                     |
| 2018          | ELISA                         | 42 (56/135)                                                | 0 (0/29)            | 6 (17/267)          |
| 2019          |                               | 54 (74/137)                                                | 6 (3/55)            | 21 (36/170)         |
|               | Chi-square                    | p>0.05                                                     | p>0.05              | p=0.04              |
| Age class     |                               |                                                            |                     |                     |
| 2018 and 2019 | Weaner and pup                | 49 (130/264)                                               | 2(2/83)             | 16 (16/99)          |
|               | Juvenile, yearling, and adult | 0 (0/8)                                                    | 100 (1/1)           | 11 (37/338)         |

| Species |       | Northern elephant seal                                     | Pacific harbor seal | California sea lion |
|---------|-------|------------------------------------------------------------|---------------------|---------------------|
| Year    | Assay | % animals with detectable antibody (number positive/total) |                     |                     |
| 2018    | HI    | 85 (25/29)                                                 | nd                  | nd                  |
| 2019    |       | 93 (34/37)                                                 | 50 (1/2)            | nd                  |

**B**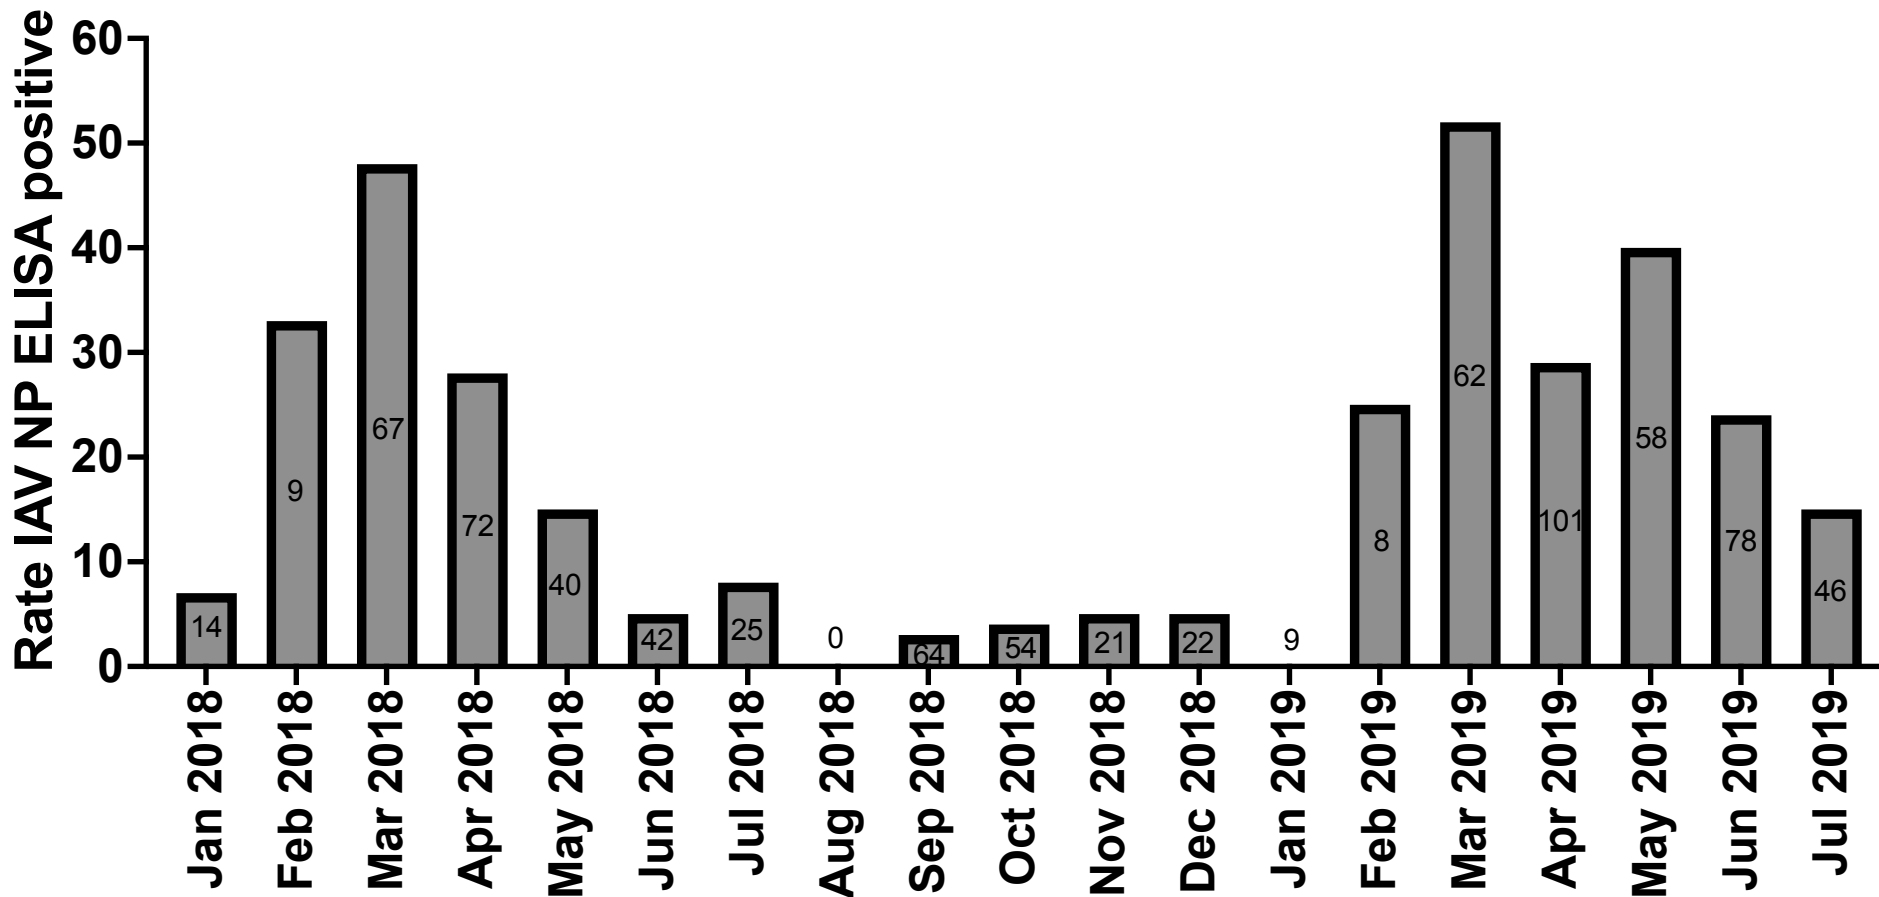



# California coast

bioRxiv preprint doi: <https://doi.org/10.1101/2022.11.04.515242>; this version posted November 10, 2022. The copyright holder for this preprint (which was not certified by peer review) is the author/funder, who has granted bioRxiv a license to display the preprint in perpetuity. It is made available under aCC-BY 4.0 International license.

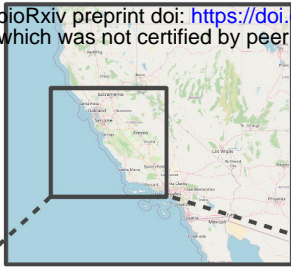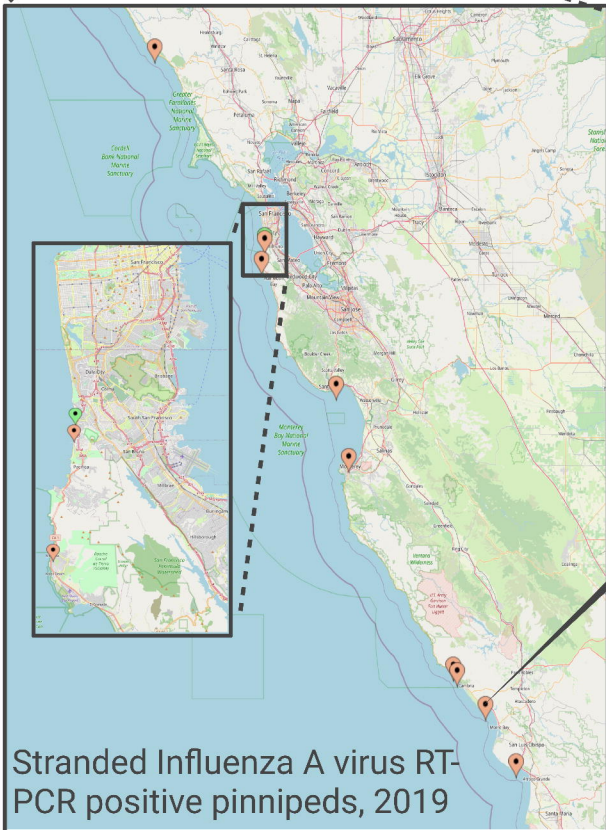

Stranded Influenza A virus RT-PCR positive pinnipeds, 2019

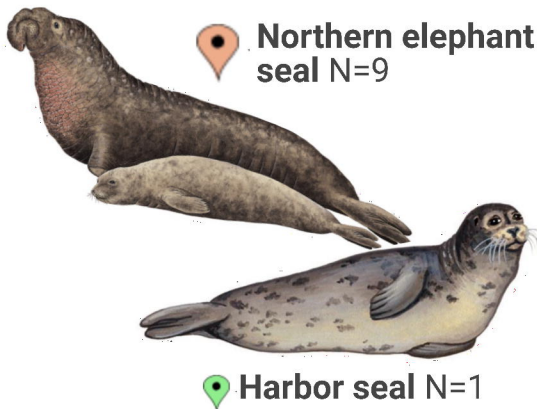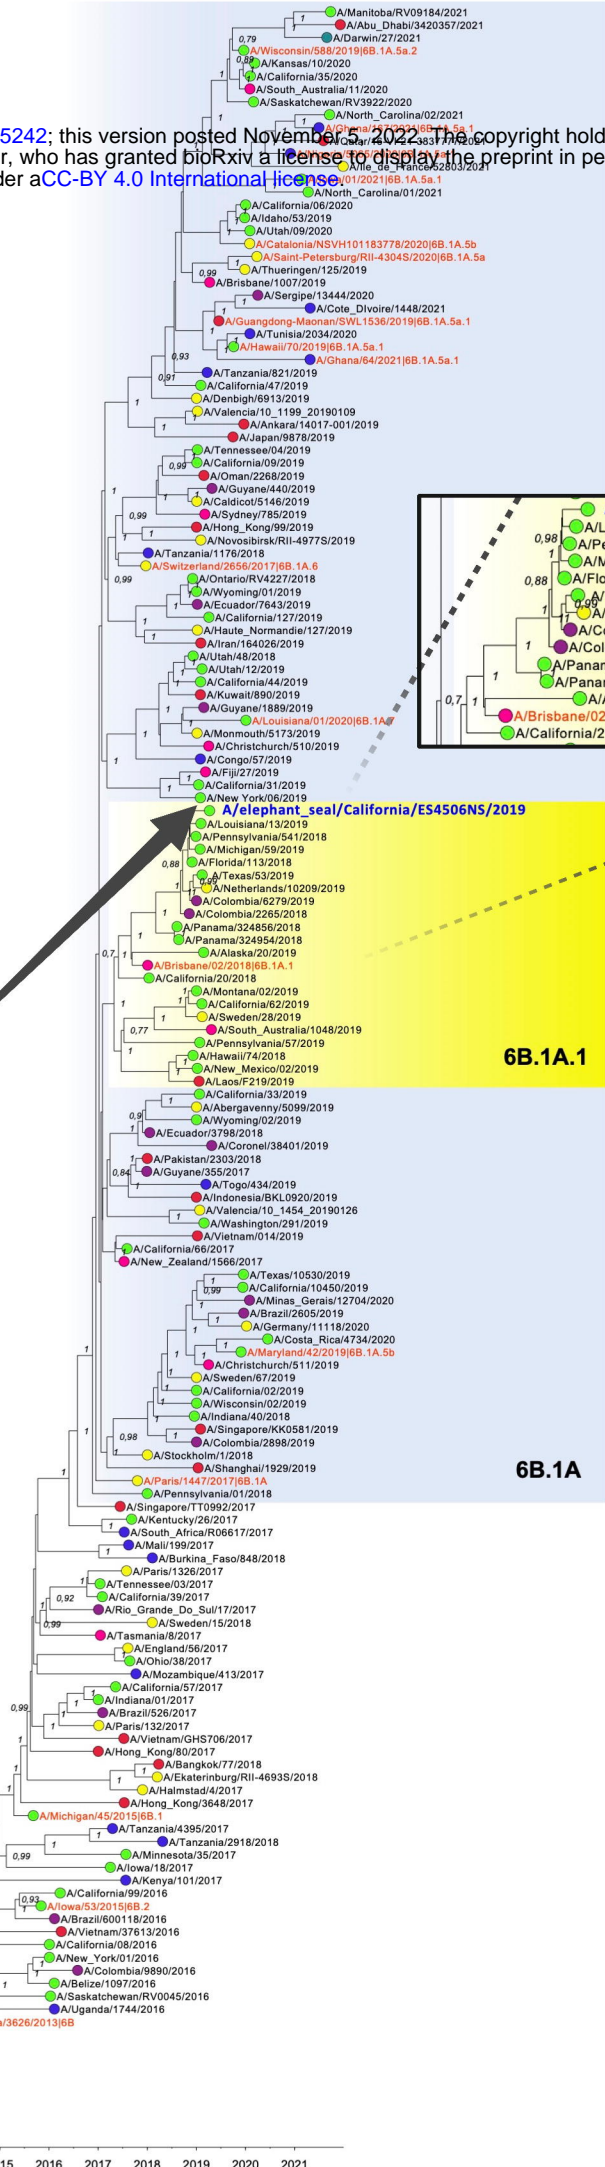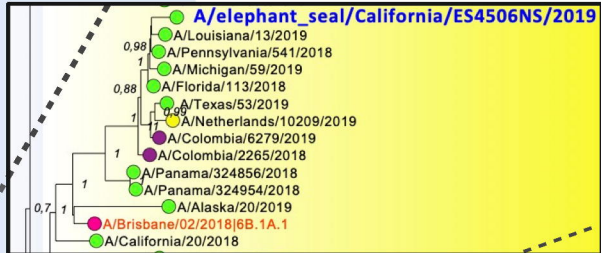

## Key for tree

- Africa
- Asia
- Europe
- North America
- Oceania
- South America

**Reference strains**  
**Seal from this study**  
**Other seals**

2008 2009 2010 2011 2012 2013 2014 2015 2016 2017 2018 2019 2020 2021
